# Supplementary material
Source: PubMed Central journal article supplement (PMC2847672)
Supplement: NIHMS180667-supplement-01.pdf [file NIHMS180667-supplement-01.pdf]

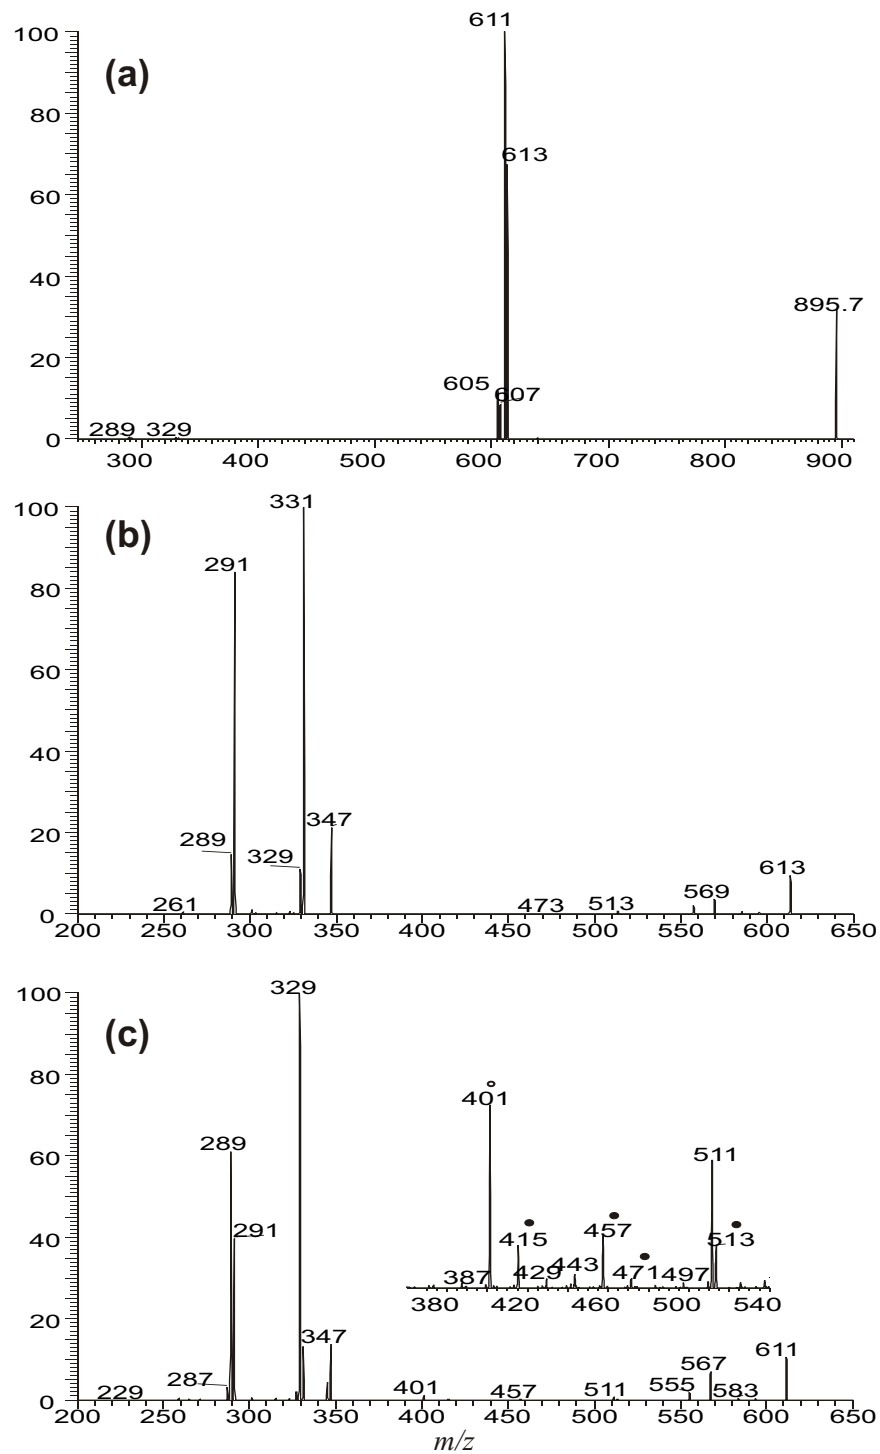

16:0/18:0/18:1-TAG

Figure 2

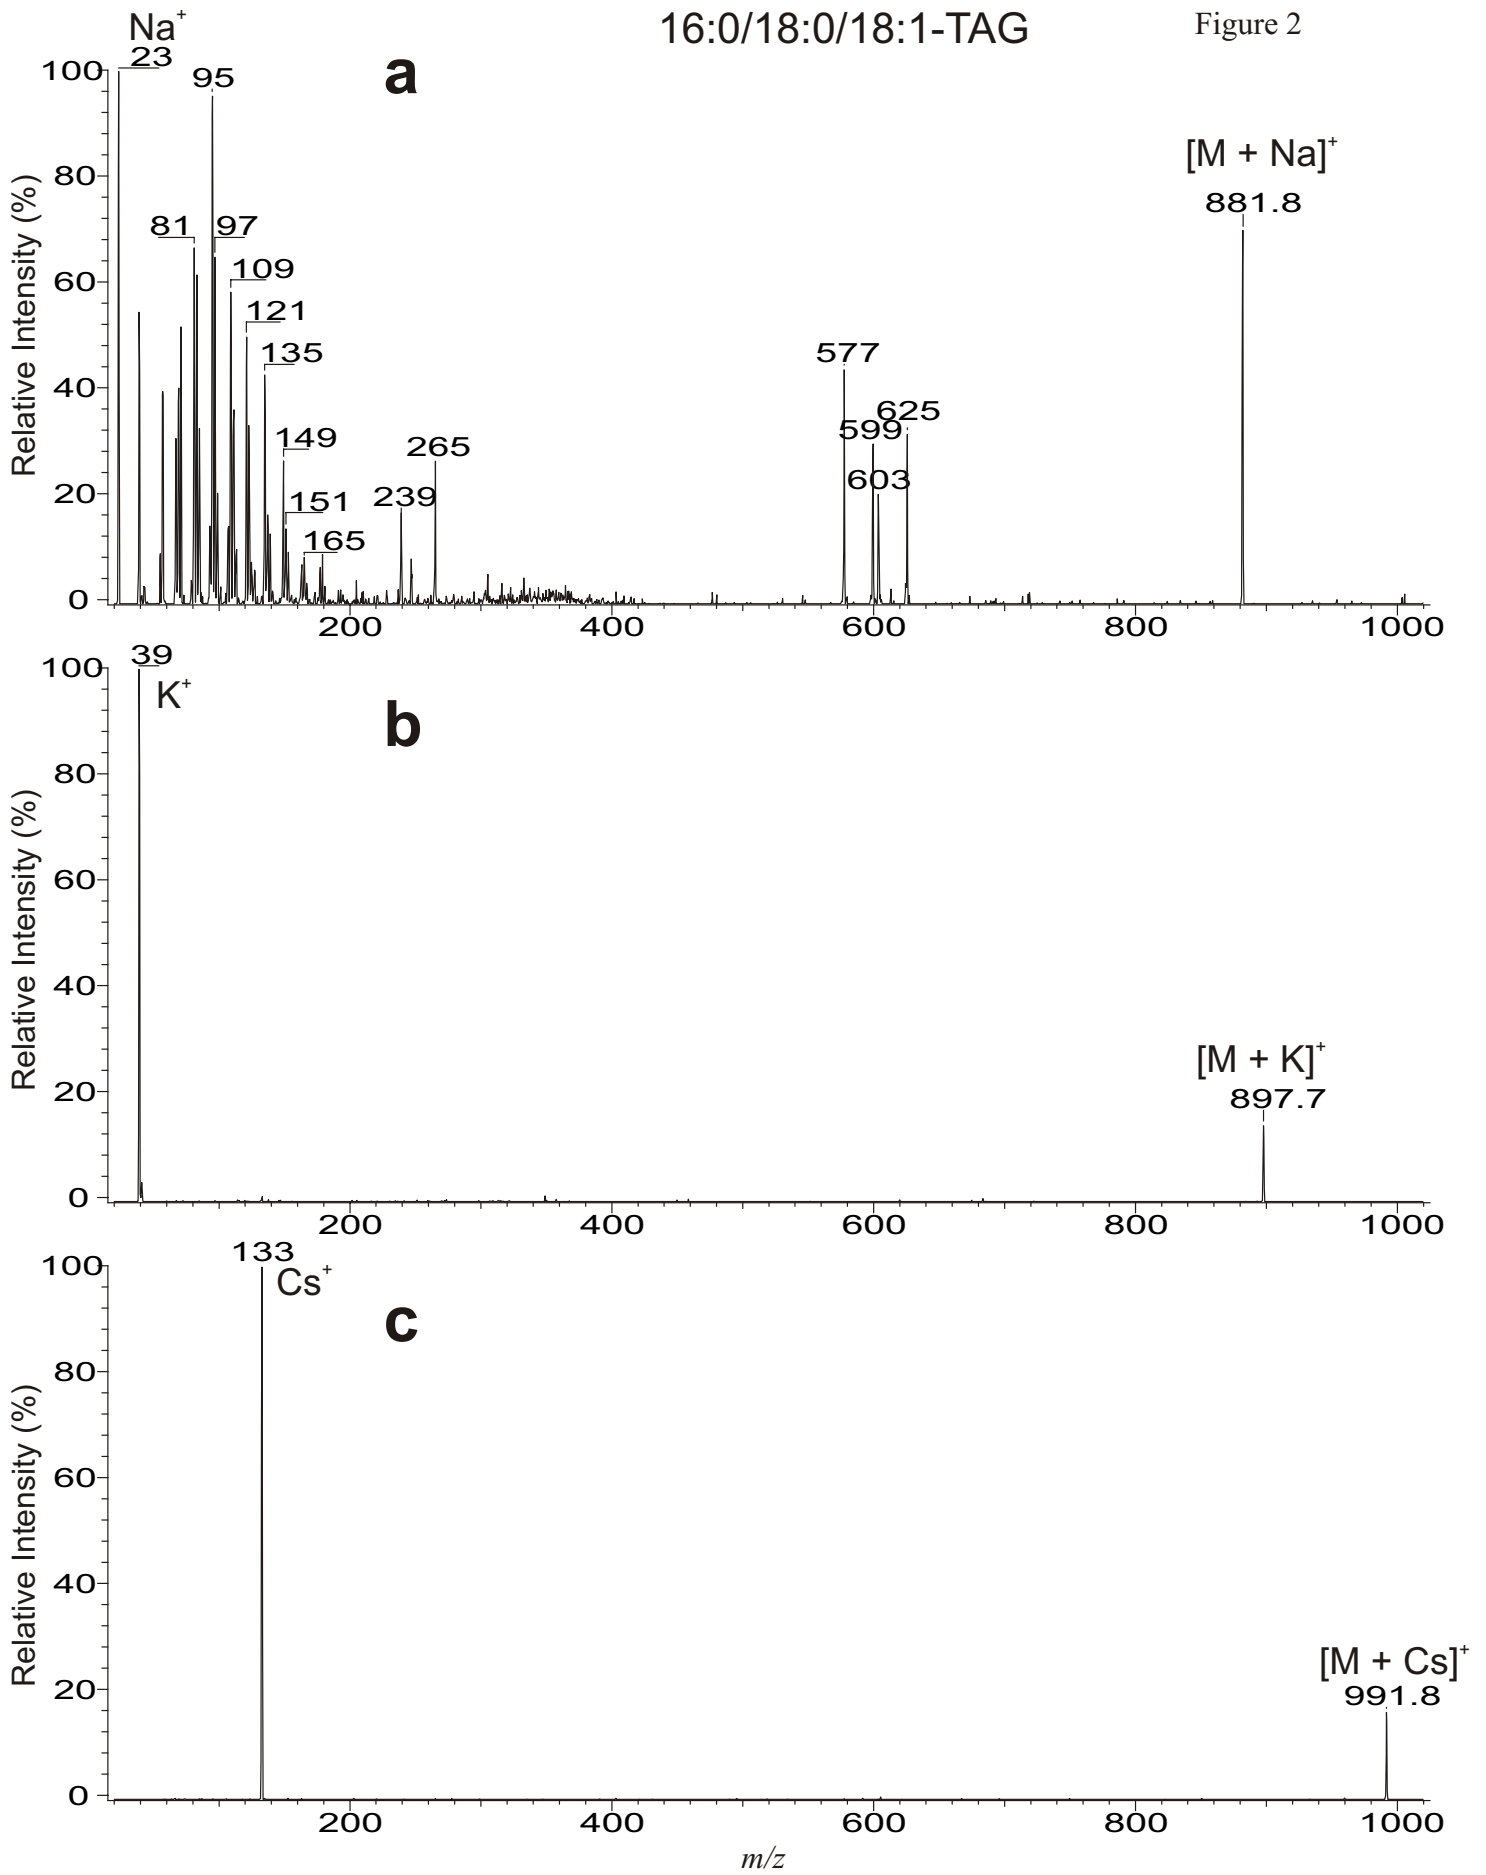

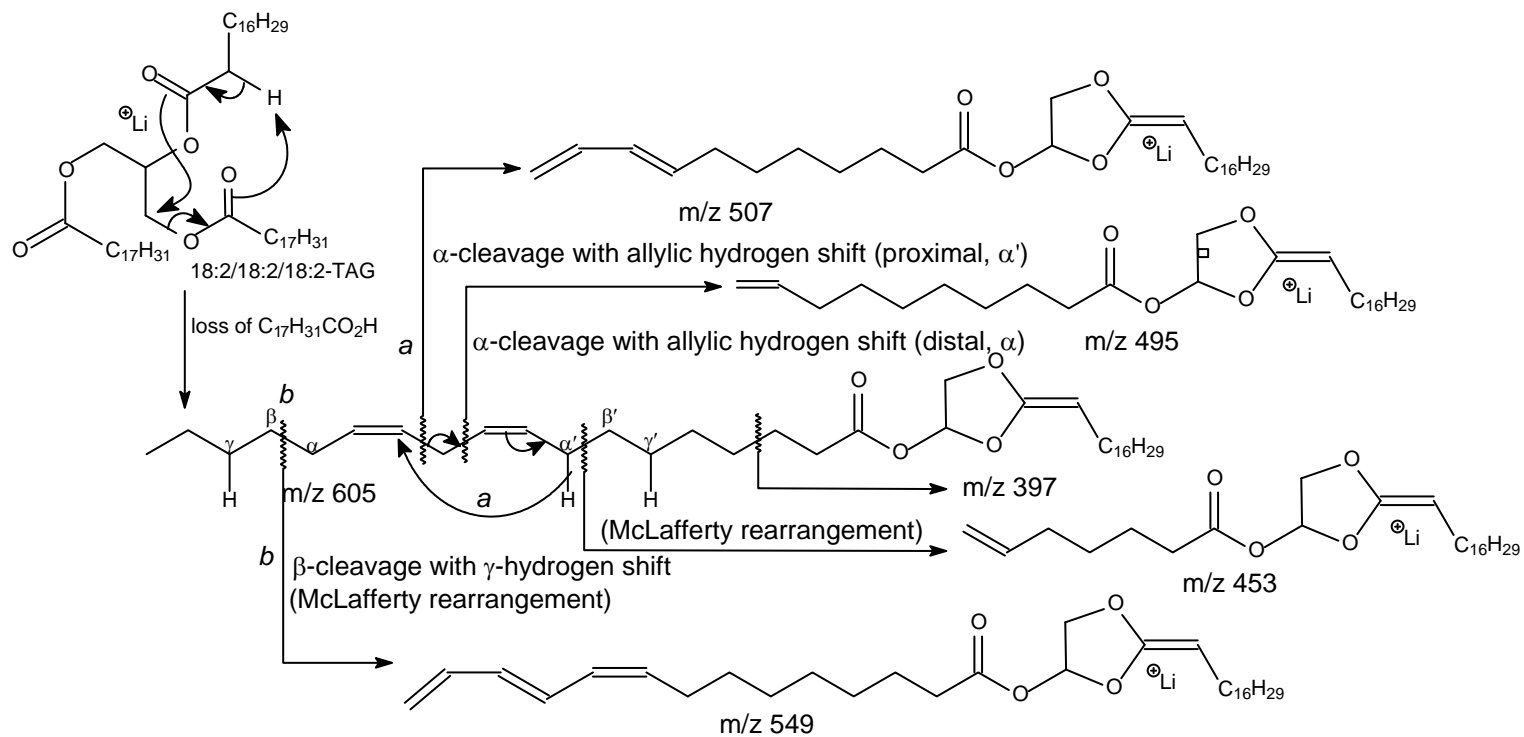

Supplemental Scheme 1. The fragmentation pathways proposed for location of double bonds along the fatty acid chain of 18:2/18:2/18:2-TAG
